# Supplementary material
Source: Copernicus journal article supplement (doi:10.5194/amt-19-4035-2026)
Supplement: Supplementary file 1 [file amt-19-4035-2026-supplement.pdf]

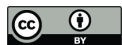

*Supplement of*

## **Sodium thiosulfate-coated ceramic denuders for ozone removal in ultrafine particle sampling**

**Elisabeth Eckenberger et al.**

*Correspondence to:* Elisabeth Eckenberger (elisabeth.eckenberger@uni-bayreuth.de) and Anke Christine Nölscher (a.noelscher@fz-juelich.de)

The copyright of individual parts of the supplement might differ from the article licence.

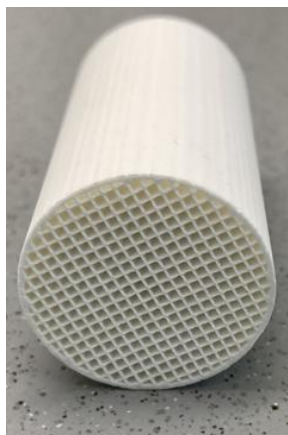

Figure S1 Photograph of the ceramic honeycomb body ( $\text{\O} 25,4 \times 50\text{mm}$ ) used as substrate for  $\text{Na}_2\text{SO}_3$  coating in this study.

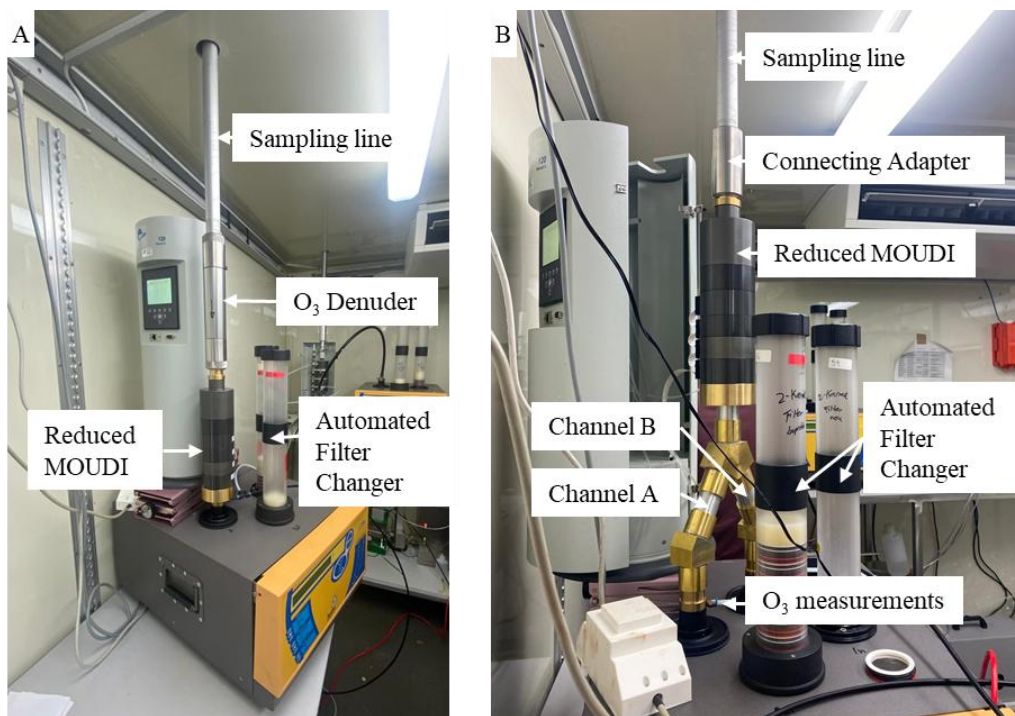

30

Figure S2 A Picture of one sampling setup, where the TSOD are in a stainless steel housing which is connected above the reduced MOUDI impactor. Such a housing is also used to connect the TSOD from the BATCH to the measurement devices as described in sections 2.2 and 2.3. B Picture of the sampling setup described in section 2.4. The uncoated or coated denuders (depending on the experiment) are behind the MOUDI impactor in channels A and B, directly placed above the UFP filter which was used for analysis.

35

**Table S1: Specifications regarding the different marker compounds that were analyzed and chosen for this study.**

| <b>Parameter</b>        | <b>HPLC-MS neg</b>                                                                                                            | <b>HPLC-MS pos</b>                                                                                                              | <b>HPLC-FLD</b>                                                                                                                                               |
|-------------------------|-------------------------------------------------------------------------------------------------------------------------------|---------------------------------------------------------------------------------------------------------------------------------|---------------------------------------------------------------------------------------------------------------------------------------------------------------|
| Analytical column       | Gemini 5u C18 110A<br>(150 mm x 4.6 mm, 5 µm)                                                                                 | Gemini 5u C18 110A<br>(150 mm x 4.6 mm, 5 µm)                                                                                   | EC 125/4 Nucleosil 100-5 C18 HD<br>(125 mm x 4 mm, 5 µm)                                                                                                      |
| Column temperature      | 40 °C                                                                                                                         | 30 °C                                                                                                                           | 30 °C                                                                                                                                                         |
| Injection volume        | 20 µL                                                                                                                         | 20 µL                                                                                                                           | 25 µL                                                                                                                                                         |
| Autosampler temperature | –                                                                                                                             | –                                                                                                                               | -5 °C                                                                                                                                                         |
| Flow rate               | 0.5 mL/min                                                                                                                    | 0.3 - 0.5 mL/min                                                                                                                | 1 mL/min                                                                                                                                                      |
| Gradient                | <b>A) 80% ACN, B) 4 mM HCOOH</b><br>0 min 5% A<br>1 min 5% A<br>18 min 50% A<br>21 min 100% A<br>29 min 100% A<br>31 min 5% A | <b>A) 80%MeOH, B) 4 mM HCOOH</b><br>0 min 50% A<br>3 min 80% A<br>12 min 100% A<br>18 min 90% A<br>20 min 50% A<br>25 min 75% A | <b>A) ACN, B) H<sub>2</sub>O (Milli-pore)</b><br>0 min 60% A<br>5 min 70% A<br>8 min 70% A<br>12 min 80% A<br>15 min 80% A<br>19 min 90% A<br>22 min 60% A    |
| Detector                | MSD<br><b>Time ESI(-)-m/z-ions</b><br>0 min 207<br>8 min 111, 157, 171, 185<br>18 min 121, 135, 183<br>25 min 193, 217        | MSD<br><b>Time ESI(+)-m/z-ions</b><br>0 min 212, 227, 269<br>12 min 257, 261, 299                                               | FLD<br><b>Time λ<sub>ex</sub> / λ<sub>em</sub> [nm]</b><br>0 min 259 / 386<br>3.3 min 242 / 388<br>5.8 min 250 / 370<br>7.5 min 270 / 390<br>13 min 290 / 430 |

**Table S2: Specifications regarding the different marker compounds that were analyzed and chosen for this study.**

| Marker          | Method      | Recovery | LOD <sub>Air</sub>                          | External standard calculation |                |
|-----------------|-------------|----------|---------------------------------------------|-------------------------------|----------------|
|                 |             |          | [pg/m <sup>3</sup> ]<br>21.6 m <sup>3</sup> | Response factor<br>[AU/μg/L]  | R <sup>2</sup> |
| POA             | HPLC-MS neg | 101±6%   | 268.06                                      | 1833                          | 0.98           |
| PA              | HPLC-MS neg | 84±6%    | 373.14                                      | 4415                          | 0.99           |
| TA              | HPLC-MS neg | 85±6%,   | 268.06                                      | 3352                          | 0.99           |
| TPA             | HPLC-MS neg | 96±6%,   | 343.52                                      | 2781                          | 0.99           |
| 6PPD            | HPLC-MS pos | 75±7%    | 20.09                                       | 26766                         | 0.98           |
| 6PPDq           | HPLC-MS pos | 81±7%    | 24.54                                       | 21767                         | 0.99           |
| BaP             | HPLC-FLD/UV | 78±5%    | 3.245                                       | 10.12                         | 1.00           |
| BbF             | HPLC-FLD/UV | 74±4%    | 4.025                                       | 12.15                         | 1.00           |
| IcdP            | HPLC-FLD/UV | 70±4%    | 3.052                                       | 3.29                          | 1.00           |
| Sum<br>Chry BaA | HPLC-FLD/UV | 97±5%    | 2.855                                       | 9.68                          | 1.00           |
| BkF             | HPLC-FLD/UV | 89±6%    | 2.679                                       | 11.80                         | 1.00           |

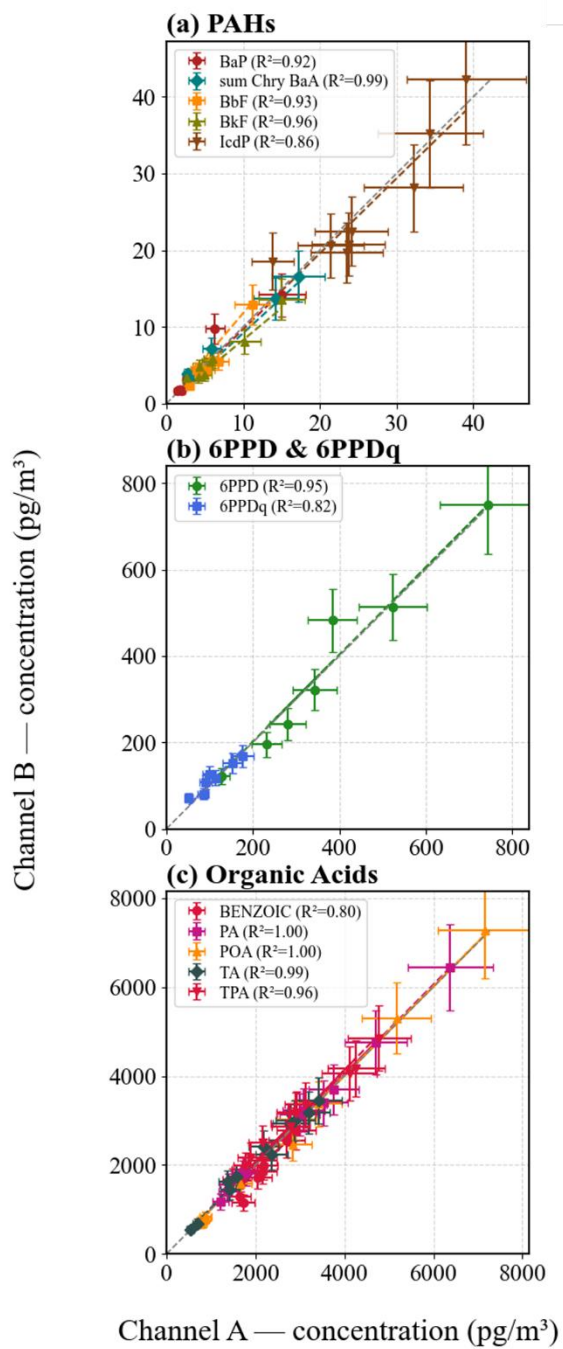

**Figure S3 Comparison of PAH concentrations between Channel A and Channel B without the deployment of the TSOD. Regression slopes ( $s$ ) and coefficients of determination ( $R^2$ ) indicate high inter-channel agreement in the absence of  $\text{O}_3$  removal.**
